# Supplementary material
Source: PubMed Central journal article supplement (PMC3552018)
Supplement: NIHMS414291-supplement-Supp_Fig_S1-S4_Supp_Table_S1.pdf [file NIHMS414291-supplement-Supp_Fig_S1-S4_Supp_Table_S1.pdf]

## Supporting information

### Quantitative analysis of pheromone-binding protein specificity

Sachin Katti, Nayanish Lokhande, Daniel González, Aaron Cassill, and Robert Renthal

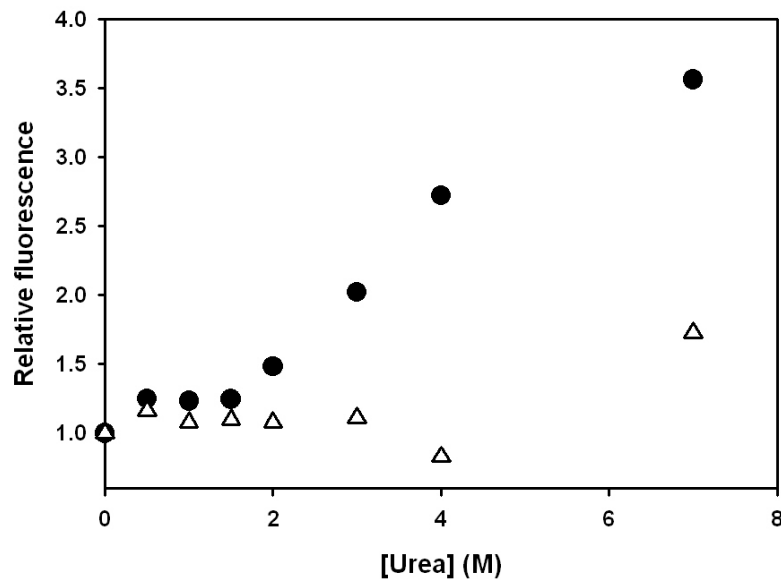

**Figure S1.** LUSH Tryptophan fluorescence in urea. Fluorescence emission at 355 nm in urea (20 mM phosphate, pH 6.5) relative to emission in the absence of urea. Circles: LUSH (1  $\mu$ M) refolded by the cystine/cysteine method; triangles: LUSH (1  $\mu$ M) not refolded.

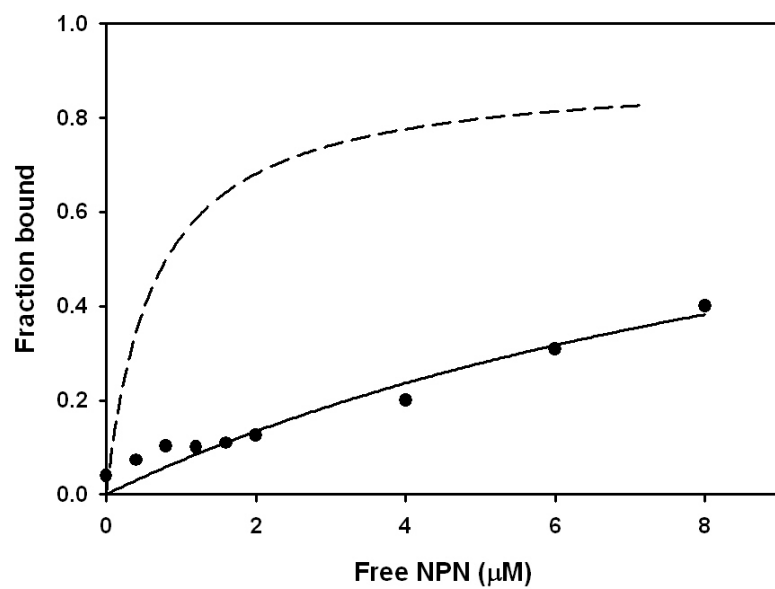

**Figure S2.** NPN binding to unfolded LUSH. Similar to figure 1A, except that LUSH is not fully refolded. Solid line: binding curve fit with dissociation constant of 12.9  $\mu\text{M}$ ; correlation coefficient = 0.97. Dashed line: binding curve fit to data in figure 1A.

## Table S1

Atomic coordinates for NPN Model 1. To display the LUSH-NPN complex in a molecular viewer (e.g. figure 2), take atoms 1-1080 from Protein Data Bank file 2GTE (LUSH, molecule A) and append the atoms below, which were positioned by AutoDock (Table 1).

| REMARK |      |     |     | MODEL       | FOR  | NPN    | BINDING | TO        | LUSH  | (2GTE,   | MOLECULE | A) |
|--------|------|-----|-----|-------------|------|--------|---------|-----------|-------|----------|----------|----|
| REMARK |      |     |     | COORDINATES | FROM | LOWEST | ENERGY  | STRUCTURE | AFTER | AUTODOCK | RUN      |    |
| ATOM   | 2001 | C2  | NPN | B           | 1    | -2.515 | 1.586   | -4.909    |       |          |          | C  |
| ATOM   | 2002 | C3  | NPN | B           | 1    | -2.046 | 0.257   | -5.076    |       |          |          | C  |
| ATOM   | 2003 | C4  | NPN | B           | 1    | -0.759 | -0.121  | -4.578    |       |          |          | C  |
| ATOM   | 2004 | C5  | NPN | B           | 1    | 0.062  | 0.851   | -3.921    |       |          |          | C  |
| ATOM   | 2005 | C6  | NPN | B           | 1    | -0.422 | 2.199   | -3.753    |       |          |          | C  |
| ATOM   | 2006 | C7  | NPN | B           | 1    | 0.381  | 3.186   | -3.092    |       |          |          | C  |
| ATOM   | 2007 | C8  | NPN | B           | 1    | -0.118 | 4.569   | -2.929    |       |          |          | C  |
| ATOM   | 2008 | C9  | NPN | B           | 1    | -1.400 | 4.944   | -3.418    |       |          |          | C  |
| ATOM   | 2009 | C10 | NPN | B           | 1    | -2.196 | 3.969   | -4.066    |       |          |          | C  |
| ATOM   | 2010 | C11 | NPN | B           | 1    | -1.686 | 2.571   | -4.234    |       |          |          | C  |
| ATOM   | 2011 | N1  | NPN | B           | 1    | -3.826 | 1.980   | -5.402    |       |          |          | N  |
| ATOM   | 2012 | C12 | NPN | B           | 1    | -4.947 | 1.845   | -4.541    |       |          |          | C  |
| ATOM   | 2013 | C13 | NPN | B           | 1    | -6.258 | 2.043   | -5.047    |       |          |          | C  |
| ATOM   | 2014 | C14 | NPN | B           | 1    | -7.379 | 1.908   | -4.187    |       |          |          | C  |
| ATOM   | 2015 | C15 | NPN | B           | 1    | -7.190 | 1.576   | -2.819    |       |          |          | C  |
| ATOM   | 2016 | C16 | NPN | B           | 1    | -5.878 | 1.378   | -2.312    |       |          |          | C  |
| ATOM   | 2017 | C17 | NPN | B           | 1    | -4.756 | 1.513   | -3.173    |       |          |          | C  |
| TER    |      |     |     |             |      |        |         |           |       |          |          |    |
| END    |      |     |     |             |      |        |         |           |       |          |          |    |

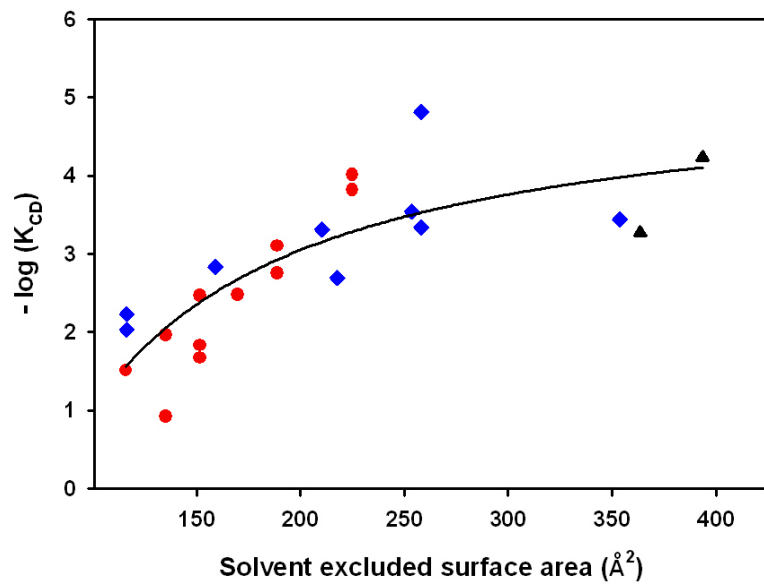

**Figure S3.** Relationship between  $\beta$ -cyclodextrin-guest affinities and molecular surface area. Solvent-excluded surface areas were calculated from the molecular structures (obtained from Cambridge Structural Database) using Python Molecular Viewer.  $\beta$ -cyclodextrin-guest 1:1 association constants ( $1/K_{CD}$ ) were obtained from reference (33). Circles: fatty acids; diamonds: aromatics; triangles: cholesterol and prostaglandin E2. Line fit to equation  $f = y_0 + ax/(b+x)$ , with  $y_0 = -61.6$ ,  $a = 66.8$ ,  $b = 6.75$ ; correlation coefficient = 0.81.

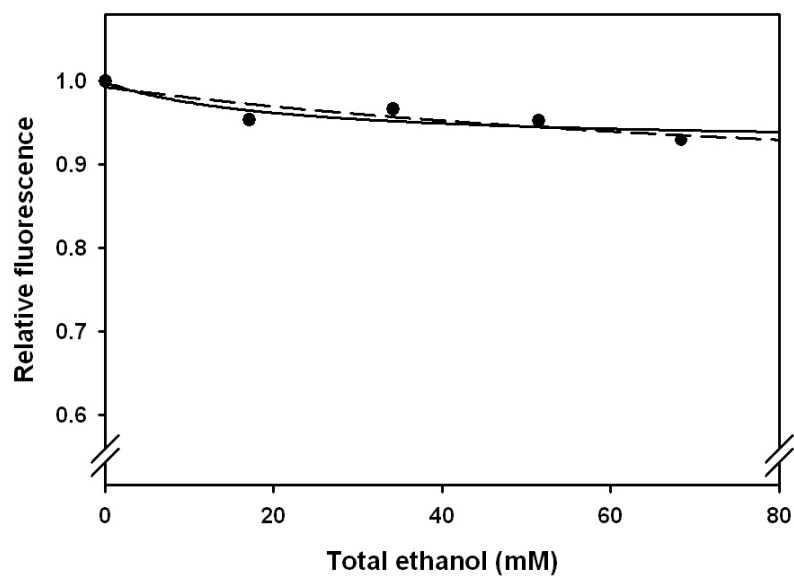

**Figure S4.** Ethanol binding only weakly affects LUSH tryptophan emission. Same conditions as figure 3. Lines fit with hyperbolic decay function  $f = y_0 + ab/(b+x)$ . Dissociation constants: solid line, 21 mM (correlation coefficient = 0.92); dashed line, 107 mM (correlation coefficient = 0.84).
